# Supplementary material for: Detecting signatures of positive selection associated with musical aptitude in the human genome
Source: PubMed Central journal article supplement (PMC4754774; doi:10.1038/srep21198), 2016-02-16
Supplement: srep21198-s1.pdf [file srep21198-s1.pdf]

## Supplementary info

### **Detecting signatures of positive selection associated with musical aptitude in the human genome**

Xuanyao Liu <sup>1,5</sup>, Chakravarthi Kanduri <sup>2</sup>, Jaana Oikkonen <sup>2</sup>, Kai Karma <sup>3</sup>, Pirre Raijas <sup>4</sup>,  
Liisa Ukkola-Vuoti <sup>2</sup>, Yik-Ying Teo <sup>1,5</sup>, Irma Järvelä <sup>2\*</sup>

<sup>1</sup>NUS Graduate School for Integrative Science and Engineering, National University of Singapore, Singapore 117456, Singapore

<sup>2</sup>Department of Medical Genetics, University of Helsinki, P.O. Box 63, 00014 University of Helsinki, Finland

<sup>3</sup>DocMus Department, University of the Arts Helsinki, P.O. Box 86, 00251 Helsinki, Finland

<sup>4</sup>Joensuu Conservatory, Rantakatu 31, 80100 Joensuu, Finland

<sup>5</sup>Saw Swee Hock School of Public Health, National University of Singapore, Singapore 117597, Singapore

Table S1. Characteristics of the participants

| <b>ID</b> | <b>GENDER</b> | <b>COMB</b> | <b>SP</b> | <b>KMT</b> | <b>AGE</b> | <b>Case/Control</b> |
|-----------|---------------|-------------|-----------|------------|------------|---------------------|
| 174       | 1             | 142,25      | 37        | 47         | 48         | Case                |
| 727       | 1             | 141,25      | 37        | 47         | 53         | Case                |
| 100       | 2             | 129         | 28        | 46         | 65         | Case                |
| 106       | 1             | 142         | 40        | 46         | 27         | Case                |
| 108       | 2             | 132,25      | 37        | 45         | 48         | Case                |
| 172       | 2             | 141         | 40        | 48         | 34         | Case                |
| 712       | 2             | 147,75      | 39        | 50         | 36         | Case                |
| 33        | 2             | 143,75      | 39        | 48         | 31         | Case                |
| 82        | 2             | 138         | 36        | 45         | 55         | Case                |
| 534       | 2             | 139,75      | 39        | 48         | 37         | Case                |
| 847       | 1             | 136,5       | 34        | 49         | 40         | Case                |
| 137       | 1             | 137,5       | 34        | 49         | 54         | Case                |
| 143       | 1             | 133,5       | 34        | 47         | 53         | Case                |
| 187       | 1             | 135,5       | 34        | 46         | 53         | Case                |
| 190       | 1             | 141,75      | 39        | 47         | 33         | Case                |
| 225       | 1             | 133,25      | 37        | 46         | 47         | Case                |
| 228       | 2             | 133,25      | 37        | 45         | 43         | Case                |
| 238       | 1             | 137         | 36        | 48         | 49         | Case                |
| 866       | 2             | 148         | 40        | 49         | 27         | Case                |
| 255       | 2             | 142         | 40        | 48         | 49         | Case                |
| 256       | 2             | 128         | 40        | 48         | 58         | Case                |
| 260       | 1             | 138,25      | 37        | 49         | 59         | Case                |
| 861       | 1             | 148         | 40        | 49         | 46         | Case                |
| 280       | 2             | 133,25      | 37        | 44         | 39         | Case                |
| 859       | 1             | 129,5       | 38        | 44         | 51         | Case                |
| 329       | 2             | 137,5       | 38        | 46         | 28         | Case                |
| 874       | 1             | 142         | 40        | 48         | 40         | Case                |
| 380       | 2             | 129         | 36        | 48         | 58         | Case                |
| 675       | 2             | 143         | 40        | 49         | 40         | Case                |
| 679       | 1             | 135,25      | 37        | 43         | 40         | Case                |
| 432       | 1             | 137,5       | 38        | 48         | 52         | Case                |
| 480       | 1             | 139         | 36        | 48         | 48         | Case                |
| 686       | 1             | 144         | 40        | 49         | 23         | Case                |
| 606       | 2             | 125,5       | 30        | 47         | 70         | Case                |
| 689       | 1             | 142,5       | 38        | 48         | 57         | Case                |
| 412       | 2             | 134         | 36        | 46         | 45         | Case                |
| 493       | 1             | 129,5       | 34        | 38         | 51         | Case                |

|            |   |        |    |    |    |         |
|------------|---|--------|----|----|----|---------|
| <b>495</b> | 1 | 133,5  | 34 | 44 | 47 | Case    |
| <b>507</b> | 1 | 131,5  | 34 | 43 | 60 | Case    |
| <b>695</b> | 2 | 127    | 36 | 36 | 62 | Case    |
| <b>525</b> | 1 | 148    | 40 | 50 | 54 | Case    |
| <b>516</b> | 2 | 134,25 | 37 | 48 | 56 | Case    |
| <b>528</b> | 2 | 144    | 40 | 48 | 50 | Case    |
| <b>570</b> | 2 | 137,25 | 37 | 47 | 31 | Case    |
| <b>536</b> | 2 | 136,75 | 39 | 45 | 36 | Case    |
| <b>574</b> | 1 | 130,5  | 30 | 46 | 58 | Case    |
| <b>599</b> | 2 | 137,25 | 37 | 47 | 40 | Case    |
| <b>611</b> | 2 | 125    | 32 | 48 | 67 | Case    |
| <b>622</b> | 1 | 128    | 28 | 46 | 59 | Case    |
| <b>623</b> | 1 | 140,5  | 38 | 45 | 23 | Case    |
| <b>626</b> | 1 | 129,25 | 29 | 47 | 55 | Case    |
| <b>633</b> | 2 | 133,75 | 39 | 45 | 44 | Case    |
| <b>641</b> | 1 | 134,75 | 39 | 48 | 36 | Case    |
| <b>642</b> | 2 | 137,75 | 39 | 47 | 39 | Case    |
| <b>647</b> | 1 | 127    | 32 | 45 | 69 | Case    |
| <b>649</b> | 1 | 142    | 40 | 47 | 30 | Case    |
| <b>655</b> | 1 | 144,75 | 39 | 49 | 34 | Case    |
| <b>660</b> | 2 | 133    | 36 | 45 | 58 | Case    |
| <b>691</b> | 2 | 143    | 40 | 49 | 51 | Case    |
| <b>705</b> | 2 | 143,75 | 39 | 48 | 18 | Case    |
| <b>728</b> | 2 | 140,75 | 39 | 48 | 21 | Case    |
| <b>729</b> | 1 | 143,5  | 38 | 50 | 21 | Case    |
| <b>738</b> | 1 | 138,25 | 37 | 48 | 42 | Case    |
| <b>765</b> | 2 | 144,5  | 38 | 49 | 34 | Case    |
| <b>767</b> | 1 | 148    | 40 | 49 | 18 | Case    |
| <b>768</b> | 2 | 143,75 | 39 | 50 | 49 | Case    |
| <b>770</b> | 1 | 131,25 | 33 | 47 | 45 | Case    |
| <b>790</b> | 1 | 143    | 40 | 49 | 31 | Case    |
| <b>794</b> | 1 | 141,5  | 38 | 50 | 24 | Case    |
| <b>852</b> | 2 | 138,25 | 37 | 48 | 36 | Case    |
| <b>863</b> | 2 | 135,5  | 38 | 44 | 54 | Case    |
| <b>414</b> | 1 | 137    | 40 | 48 | 48 | Case    |
| <b>694</b> | 2 | 129,25 | 37 | 44 | 67 | Case    |
| <b>800</b> | 2 | 140,5  | 38 | 48 | 32 | Case    |
| <b>200</b> | 2 | 80,75  | 23 | 27 | 85 | Control |
| <b>715</b> | 2 | 114,5  | 22 | 41 | 21 | Control |
| <b>113</b> | 2 | 103,5  | 30 | 28 | 57 | Control |
| <b>714</b> | 2 | 111    | 20 | 44 | 30 | Control |
| <b>48</b>  | 2 | 96     | 20 | 34 | 50 | Control |

|            |   |        |    |    |    |         |
|------------|---|--------|----|----|----|---------|
| <b>129</b> | 2 | 104    | 20 | 35 | 59 | Control |
| <b>134</b> | 1 | 100,25 | 25 | 28 | 60 | Control |
| <b>857</b> | 2 | 100,25 | 29 | 34 | 49 | Control |
| <b>745</b> | 2 | 100,75 | 27 | 35 | 68 | Control |
| <b>38</b>  | 1 | 95,25  | 29 | 34 | 72 | Control |
| <b>9</b>   | 1 | 104,5  | 26 | 30 | 19 | Control |
| <b>5</b>   | 2 | 105,75 | 31 | 29 | 27 | Control |
| <b>313</b> | 2 | 99,25  | 29 | 32 | 60 | Control |
| <b>363</b> | 1 | 95,75  | 27 | 25 | 31 | Control |
| <b>150</b> | 2 | 89,5   | 26 | 25 | 51 | Control |
| <b>661</b> | 2 | 117,25 | 25 | 46 | 20 | Control |
| <b>204</b> | 1 | 104,25 | 25 | 37 | 52 | Control |
| <b>212</b> | 2 | 83,5   | 22 | 25 | 45 | Control |
| <b>222</b> | 1 | 92,25  | 25 | 25 | 61 | Control |
| <b>234</b> | 1 | 105    | 20 | 42 | 57 | Control |
| <b>229</b> | 1 | 96     | 20 | 35 | 86 | Control |
| <b>232</b> | 2 | 104    | 20 | 42 | 58 | Control |
| <b>248</b> | 2 | 91,25  | 25 | 25 | 52 | Control |
| <b>267</b> | 1 | 111,25 | 33 | 27 | 41 | Control |
| <b>871</b> | 2 | 104,75 | 23 | 34 | 53 | Control |
| <b>275</b> | 2 | 93     | 20 | 30 | 56 | Control |
| <b>276</b> | 1 | 99,75  | 23 | 34 | 41 | Control |
| <b>293</b> | 2 | 103,25 | 29 | 25 | 46 | Control |
| <b>296</b> | 2 | 107    | 20 | 44 | 42 | Control |
| <b>324</b> | 2 | 103,25 | 25 | 27 | 30 | Control |
| <b>875</b> | 2 | 106,75 | 27 | 36 | 27 | Control |
| <b>387</b> | 1 | 103,25 | 25 | 32 | 56 | Control |
| <b>339</b> | 1 | 102,75 | 27 | 30 | 67 | Control |
| <b>518</b> | 1 | 107,75 | 27 | 35 | 49 | Control |
| <b>669</b> | 2 | 96,75  | 27 | 25 | 81 | Control |
| <b>384</b> | 2 | 91     | 20 | 37 | 59 | Control |
| <b>674</b> | 2 | 93,5   | 22 | 28 | 42 | Control |
| <b>676</b> | 2 | 93     | 20 | 36 | 70 | Control |
| <b>430</b> | 2 | 110,25 | 25 | 47 | 28 | Control |
| <b>464</b> | 1 | 110,5  | 22 | 47 | 37 | Control |
| <b>476</b> | 1 | 103    | 28 | 26 | 58 | Control |
| <b>685</b> | 2 | 106,5  | 30 | 27 | 30 | Control |
| <b>548</b> | 2 | 99,75  | 23 | 33 | 36 | Control |
| <b>544</b> | 1 | 108,25 | 29 | 29 | 37 | Control |
| <b>690</b> | 2 | 105,75 | 27 | 38 | 36 | Control |
| <b>583</b> | 2 | 108,25 | 29 | 25 | 48 | Control |
| <b>569</b> | 1 | 106    | 28 | 34 | 32 | Control |

|            |   |        |    |    |    |         |
|------------|---|--------|----|----|----|---------|
| <b>396</b> | 2 | 107    | 24 | 40 | 50 | Control |
| <b>573</b> | 2 | 101    | 20 | 35 | 52 | Control |
| <b>590</b> | 2 | 114,75 | 31 | 33 | 30 | Control |
| <b>605</b> | 1 | 84     | 20 | 34 | 27 | Control |
| <b>607</b> | 1 | 76     | 20 | 26 | 83 | Control |
| <b>613</b> | 2 | 96,5   | 26 | 28 | 54 | Control |
| <b>617</b> | 2 | 109,75 | 23 | 42 | 44 | Control |
| <b>630</b> | 1 | 98,75  | 23 | 36 | 23 | Control |
| <b>643</b> | 2 | 106,5  | 26 | 36 | 26 | Control |
| <b>648</b> | 2 | 93     | 20 | 34 | 18 | Control |
| <b>653</b> | 2 | 103,25 | 29 | 25 | 13 | Control |
| <b>663</b> | 2 | 92     | 24 | 25 | 24 | Control |
| <b>681</b> | 1 | 98     | 20 | 39 | 59 | Control |
| <b>698</b> | 2 | 89     | 20 | 25 | 37 | Control |
| <b>700</b> | 1 | 99,25  | 25 | 37 | 50 | Control |
| <b>719</b> | 2 | 94     | 28 | 25 | 68 | Control |
| <b>732</b> | 2 | 106,25 | 29 | 41 | 45 | Control |
| <b>744</b> | 2 | 112,5  | 30 | 34 | 28 | Control |
| <b>778</b> | 2 | 113    | 32 | 32 | 30 | Control |
| <b>785</b> | 1 | 98,5   | 26 | 27 | 31 | Control |
| <b>788</b> | 1 | 103,75 | 23 | 35 | 42 | Control |
| <b>797</b> | 1 | 101,5  | 22 | 35 | 43 | Control |
| <b>826</b> | 2 | 76     | 20 | 26 | 13 | Control |
| <b>832</b> | 2 | 108,75 | 27 | 48 | 15 | Control |
| <b>837</b> | 1 | 85     | 20 | 25 | 54 | Control |
| <b>838</b> | 2 | 83,75  | 23 | 27 | 65 | Control |
| <b>844</b> | 1 | 100,5  | 30 | 25 | 33 | Control |

Table S2. Positive selection region associated with musical aptitude detected by Fst.

| <b>C</b>  | <b>Start</b> | <b>End</b> | <b>No. of</b> | <b>window.fst</b> | <b>Genes</b>                                         |
|-----------|--------------|------------|---------------|-------------------|------------------------------------------------------|
| <b>hr</b> |              |            | <b>SNPs</b>   |                   |                                                      |
| 1         | 6212843      | 6411024    | 47            | 0.065             | CHD5,RPL22,RNF207,ICMT,LINC00337,HES3,GPR153,ACOT7,  |
| 1         | 18090975     | 18289252   | 76            | 0.087             | ACTL8,                                               |
| 1         | 31278481     | 31471702   | 68            | 0.076             | SDC3,PUM1,SNORD103B,SNORD103A,SNORD85,               |
| 1         | 115672664    | 115870310  | 75            | 0.064             | NGF,                                                 |
| 1         | 163645519    | 163845420  | 44            | 0.066             |                                                      |
| 1         | 212295571    | 212474288  | 44            | 0.072             | PPP2R5A,                                             |
| 1         | 242599000    | 242798972  | 78            | 0.063             | PLD5,                                                |
| 2         | 26522041     | 26720434   | 46            | 0.063             | GPR113,EPT1,DRC1,OTOF,                               |
| 2         | 69004457     | 69201894   | 91            | 0.066             | ARHGAP25,BMP10,GKN2,GKN1,                            |
| 2         | 85124209     | 85321746   | 33            | 0.068             | TMSB10,KCMF1,                                        |
| 2         | 102160250    | 102359923  | 42            | 0.076             | MAP4K4,                                              |
| 2         | 116362694    | 116551962  | 31            | 0.073             | DPP10,                                               |
| 2         | 133838236    | 134034022  | 47            | 0.064             | NCKAP5,                                              |
| 2         | 134242471    | 134441766  | 71            | 0.067             | NCKAP5,                                              |
| 2         | 183151764    | 183350379  | 45            | 0.071             | PDE1A,                                               |
| 2         | 193046220    | 193238289  | 29            | 0.063             | TMEFF2,                                              |
| 2         | 201656457    | 201854175  | 24            | 0.064             | AOX2P,BZW1,CLK1,PPIL3,NIF3L1,ORC2,FAM126B,           |
| 2         | 202149696    | 202348303  | 29            | 0.065             | CASP8,ALS2CR12,TRAK2,STRADB,                         |
| 2         | 207470884    | 207665145  | 59            | 0.077             | ADAM23,LOC200726,DYTN,MDH1B,FASTKD2,MIR3130,MIR3130, |
| 2         | 211151774    | 211341349  | 39            | 0.071             | MYL1,LANCL1,                                         |
| 3         | 71212990     | 71412654   | 60            | 0.074             | FOXP1,                                               |
| 3         | 78064944     | 78256536   | 19            | 0.066             |                                                      |
| 3         | 121481801    | 121670405  | 58            | 0.065             | IQCB1,EAF2,SLC15A2,                                  |
| 3         | 160499192    | 160696867  | 34            | 0.064             | PPM1L,                                               |

|   |           |           |     |       |                                                                     |
|---|-----------|-----------|-----|-------|---------------------------------------------------------------------|
| 3 | 165337109 | 165505177 | 32  | 0.073 | BCHE,                                                               |
| 3 | 165751527 | 165942272 | 34  | 0.081 |                                                                     |
| 3 | 169679950 | 169861358 | 39  | 0.067 | LOC100128164,SEC62,GP<br>R160,PHC3,                                 |
| 3 | 174767848 | 174966522 | 61  | 0.064 | NAALADL2,NAALADL2,                                                  |
| 3 | 180544880 | 180737641 | 20  | 0.065 | FXR1,DNAJC19,                                                       |
| 3 | 180749249 | 180932119 | 19  | 0.070 |                                                                     |
| 4 | 163808442 | 164007992 | 32  | 0.066 |                                                                     |
| 5 | 31518912  | 31717468  | 90  | 0.068 | DROSHA,C5orf22,                                                     |
| 5 | 37984257  | 38176521  | 72  | 0.072 |                                                                     |
| 5 | 54187813  | 54379426  | 57  | 0.136 | ESM1,GZMK,                                                          |
| 5 | 54392373  | 54563480  | 38  | 0.139 | GZMA,CDC20B,GPX8,MIR<br>449A,MIR449B,MIR449C,<br>MCIDAS,CCNO,DHX29, |
| 5 | 92040221  | 92236350  | 53  | 0.072 |                                                                     |
| 5 | 114733752 | 114928381 | 48  | 0.076 | FEM1C,TMED7,TICAM2,                                                 |
| 5 | 120123994 | 120318488 | 31  | 0.069 |                                                                     |
| 5 | 120328270 | 120524720 | 40  | 0.120 |                                                                     |
| 5 | 131951996 | 132151071 | 44  | 0.064 | RAD50,IL13,IL4,KIF3A,CC<br>NI2,SEPT8,SOWAHA,                        |
| 5 | 132355147 | 132550830 | 36  | 0.071 | ZCCHC10,HSPA4,FSTL4,                                                |
| 5 | 149276198 | 149467663 | 66  | 0.073 | PDE6A,SLC26A2,TIGD6,H<br>MGXB3,CSF1R,                               |
| 5 | 150901111 | 151097281 | 86  | 0.063 | FAT2,SPARC,                                                         |
| 5 | 167755986 | 167946261 | 88  | 0.069 | WWC1,RARS,                                                          |
| 5 | 169793712 | 169992533 | 101 | 0.079 | KCNIP1,KCNMB1,                                                      |
| 5 | 171230798 | 171419658 | 36  | 0.068 | FBXW11,                                                             |
| 5 | 174481433 | 174678058 | 87  | 0.082 |                                                                     |
| 6 | 13209794  | 13400667  | 73  | 0.066 | PHACTR1,LOC100130357,<br>TBC1D7,GFOD1,                              |
| 6 | 39731430  | 39929194  | 75  | 0.064 | DAAM2,MOCS1,                                                        |
| 6 | 67730693  | 67929389  | 40  | 0.069 |                                                                     |

|    |           |           |     |       |                                                 |
|----|-----------|-----------|-----|-------|-------------------------------------------------|
| 6  | 69802200  | 70001186  | 32  | 0.071 | BAI3,                                           |
| 6  | 114165133 | 114364702 | 55  | 0.066 | MARCKS,LOC285758,FLJ34503,HDAC2,                |
| 6  | 147822074 | 148021909 | 88  | 0.074 | SAMD5,                                          |
| 7  | 15021223  | 15215277  | 75  | 0.065 |                                                 |
| 7  | 19734101  | 19916190  | 48  | 0.069 | TWISTNB,MIR3146,TMEM196,                        |
| 7  | 95516569  | 95716383  | 55  | 0.069 | DYNC11I,                                        |
| 7  | 101697980 | 101895864 | 31  | 0.064 | CUX1,                                           |
| 8  | 1778697   | 1978115   | 129 | 0.071 | ARHGEF10,KBTBD11,                               |
| 8  | 1983582   | 2181540   | 170 | 0.064 | MYOM2,                                          |
| 8  | 16774970  | 16973443  | 66  | 0.070 | FGF20,MICU3,                                    |
| 8  | 17780036  | 17977650  | 91  | 0.069 | PCM1,ASAH1,                                     |
| 8  | 19204945  | 19401179  | 70  | 0.071 | SH2D4A,CSGALNACT1,                              |
| 8  | 26724326  | 26923058  | 75  | 0.065 |                                                 |
| 8  | 62370511  | 62566588  | 47  | 0.065 | CLVS1,ASPH,                                     |
| 8  | 62803036  | 62969408  | 40  | 0.063 |                                                 |
| 8  | 63635874  | 63830366  | 46  | 0.064 | NKAIN3,                                         |
| 8  | 64448090  | 64642614  | 32  | 0.068 |                                                 |
| 8  | 75207653  | 75405213  | 42  | 0.083 | JPH1,GDAP1,                                     |
| 9  | 853004    | 1052722   | 77  | 0.064 | DMRT1,DMRT3,DMRT2,                              |
| 9  | 2468858   | 2668187   | 132 | 0.065 | FLJ35024,VLDLR,                                 |
| 9  | 96792054  | 96990968  | 39  | 0.069 | PTPDC1,MIRLET7A1,MIRLET7F1,MIRLET7DHG,MIRLET7D, |
| 9  | 98670456  | 98867813  | 47  | 0.076 | ERCC6L2,LINC00092,LOC158435,                    |
| 9  | 111890197 | 112089520 | 65  | 0.064 | FRRS1L,EPB41L4B,                                |
| 9  | 133250275 | 133442778 | 73  | 0.080 | ASS1,                                           |
| 10 | 6657775   | 6857219   | 101 | 0.087 | LINC00707,                                      |
| 10 | 14574817  | 14774103  | 114 | 0.065 | FAM107B,                                        |



|    |           |           |     |       |                                                      |
|----|-----------|-----------|-----|-------|------------------------------------------------------|
| 10 | 21907016  | 22098701  | 18  | 0.066 | MLLT10,DNAJC1,                                       |
| 10 | 28993801  | 29183994  | 79  | 0.069 | LINC00837,C10orf126,                                 |
| 10 | 68813983  | 69013466  | 48  | 0.070 | CTNNA3,LRRTM3,                                       |
| 10 | 70882515  | 71082214  | 67  | 0.073 | VPS26A,SUPV3L1,HKDC1,<br>HK1,                        |
| 10 | 99443975  | 99642731  | 68  | 0.077 | AVPI1,MARVELD1,ZFYVE2<br>7,SFRP5,GOLGA7B,CRTAC<br>1, |
| 10 | 112799928 | 112996845 | 69  | 0.077 | ADRA2A,                                              |
| 10 | 132822263 | 133020132 | 116 | 0.066 | TCERG1L,                                             |
| 10 | 133227554 | 133377136 | 70  | 0.073 |                                                      |
| 10 | 134045675 | 134244680 | 58  | 0.073 | STK32C,LRRC27,PWWP2B<br>,                            |
| 11 | 57731052  | 57930210  | 51  | 0.070 | OR9Q1,OR6Q1,OR9I1,                                   |
| 11 | 71239086  | 71419408  | 27  | 0.064 | KRTAP5,KRTAP5,KRTAP5,<br>KRTAP5,KRTAP5,              |
| 11 | 85332482  | 85526399  | 41  | 0.074 | DLG2,TMEM126B,TMEM<br>126A,CREBZF,CCDC89,SY<br>TL2,  |
| 11 | 111037249 | 111233450 | 61  | 0.079 | C11orf53,C11orf92,C11or<br>f93,MIR4491,POU2AF1,      |
| 12 | 13927062  | 14125734  | 78  | 0.079 | GRIN2B,                                              |
| 12 | 45975915  | 46145212  | 36  | 0.064 | LINC00938,ARID2,                                     |
| 12 | 62272569  | 62466901  | 73  | 0.068 | FAM19A2,                                             |
| 12 | 96309877  | 96491750  | 75  | 0.064 | CCDC38,AMDHD1,HAL,LT<br>A4H,                         |
| 12 | 115616511 | 115816442 | 81  | 0.085 |                                                      |
| 12 | 118885039 | 119083566 | 54  | 0.086 |                                                      |
| 12 | 129547345 | 129745507 | 129 | 0.082 | TMEM132D,                                            |
| 12 | 129955359 | 130151190 | 101 | 0.065 | TMEM132D,                                            |
| 13 | 29841357  | 30036352  | 88  | 0.072 | MTUS2,                                               |
| 13 | 96360079  | 96558852  | 24  | 0.067 | DNAJC3,UGGT2,                                        |
| 13 | 96590060  | 96777428  | 19  | 0.085 | UGGT2,HS6ST3,                                        |

|    |           |           |     |       |                                                                       |
|----|-----------|-----------|-----|-------|-----------------------------------------------------------------------|
| 14 | 22433866  | 22633640  | 90  | 0.065 |                                                                       |
| 14 | 26284540  | 26484040  | 52  | 0.068 |                                                                       |
| 14 | 30395066  | 30593866  | 48  | 0.084 | PRKD1,                                                                |
| 14 | 95358513  | 95556747  | 96  | 0.070 | DICER1,                                                               |
| 14 | 97650049  | 97849962  | 46  | 0.062 |                                                                       |
| 14 | 101743391 | 101942768 | 63  | 0.081 |                                                                       |
| 15 | 86840217  | 87037559  | 70  | 0.069 | AGBL1,AGBL1,                                                          |
| 15 | 87045550  | 87232413  | 68  | 0.066 | AGBL1,                                                                |
| 15 | 93939485  | 94135579  | 108 | 0.077 |                                                                       |
| 16 | 4124300   | 4318455   | 58  | 0.070 | ADCY9,SRL,LOC10050750<br>1,TFAP4,                                     |
| 16 | 19421858  | 19620862  | 60  | 0.069 | TMC5,GDE1,CCP110,C16<br>orf62,                                        |
| 16 | 79016116  | 79214272  | 133 | 0.073 | WVOX,                                                                 |
| 17 | 9802584   | 9999784   | 86  | 0.065 | RCVRN,GAS7,                                                           |
| 17 | 51613235  | 51802835  | 39  | 0.063 |                                                                       |
| 17 | 72929391  | 73128586  | 64  | 0.069 | OTOP2,OTOP3,HID1,CDR<br>2L,ICT1,ATP5H,KCTD2,SLC<br>16A5,ARMC7,NT5C,   |
| 18 | 13271319  | 13471199  | 60  | 0.088 | LDLRAD4,MIR5190,                                                      |
| 18 | 47730011  | 47926178  | 58  | 0.063 | CCDC11,MBD1,CXXC1,SK<br>A1,                                           |
| 18 | 77839701  | 78015180  | 32  | 0.065 | ADNP2,PARD6G,PARD6G,                                                  |
| 19 | 47073819  | 47273268  | 43  | 0.069 | PPP5D1,CALM3,PTGIR,G<br>NG8,DACT3,DACT3,PRKD<br>2,MIR320E,STRN4,FKRP, |
| 20 | 18438954  | 18625194  | 33  | 0.077 | DZANK1,POLR3F,MIR319<br>2,RBBP9,SEC23B,LINC004<br>93,DTD1,            |
| 20 | 40365781  | 40564041  | 52  | 0.079 |                                                                       |
| 20 | 49960636  | 50160035  | 71  | 0.080 | NFATC2,MIR3194,                                                       |
| 21 | 17275170  | 17472366  | 45  | 0.066 |                                                                       |
| 21 | 26476184  | 26669398  | 38  | 0.067 |                                                                       |
| 21 | 37137766  | 37327654  | 31  | 0.073 |                                                                       |
| 21 | 37338018  | 37536408  | 77  | 0.066 | SETD4,LOC100133286,CB<br>R1,CBR3,CBR3,                                |

|           |          |          |     |       |                        |
|-----------|----------|----------|-----|-------|------------------------|
| <b>22</b> | 23815760 | 24004787 | 56  | 0.063 | IGLL1,C22orf43,GUSBP11 |
| <b>22</b> | 49484533 | 49683905 | 142 | 0.094 | ,                      |

Figure S1. PCA of our study samples with selected Hapmap 3 populations.

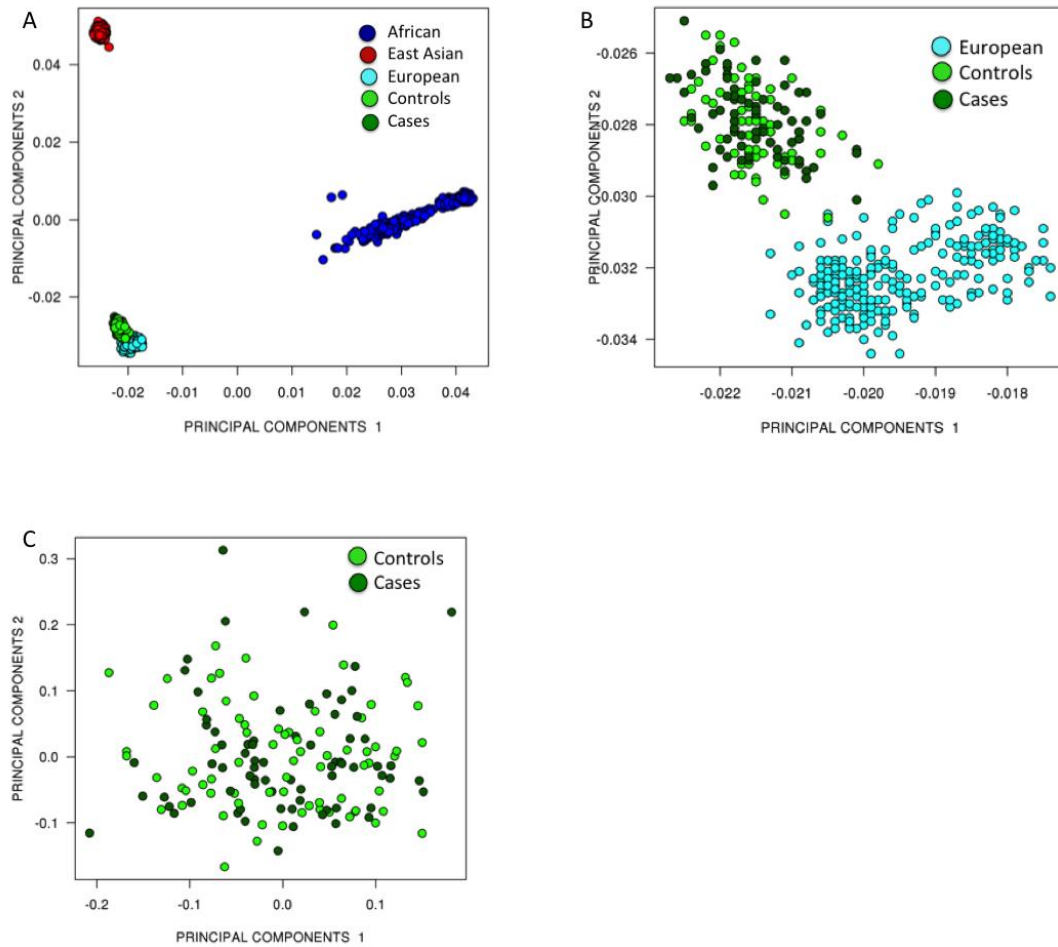

Populations in PCA analyses are from Hapmap3 and our cases and controls. For East Asian populations, we included all samples from CHB, CHD and JPT. European populations include all samples from CEU and TSI. African populations include all four African populations ASW, LWK, MKK, YRI. The PCA analysis is based on 49303 SNPs that are randomly chosen from the genome-wide SNPs. A) PCA of our study samples with selected Hapmap3 populations B) PCA of our study samples with Hapmap3 European populations C) PCA of cases and controls.
